# Supplementary material
Source: publisher site journal article supplement (https://www.dovepress.com/article/412081)
Supplement: Supplementary file 1 [file get_supplementary_file.php]

### Supplementary materials

### Primary International Classification of Diseases, Tenth Revision, Clinical Modification (ICD-10-CM) diagnosis codes included in the analysis to identify MSK-specific medical claims

G5700, G5701, G5702, M12011, M12012, M12019, M12051, M12052, M12059, M12061, M12062, M12069, M12111, M12112, M12119, M12151, M12152, M12159, M12161, M12162, M12169, M1218, M12211, M12212, M12219, M12251, M12252, M12259, M12261, M12262, M12269, M12311, M12312, M12319, M12351, M12352, M12359, M12361, M12362, M12369, M12411, M12412, M12419, M12451, M12452, M12459, M12461, M12462, M12469, M12511, M12512, M12519, M12551, M12552, M12559, M12561, M12562, M12569, M12811, M12812, M12819, M12851, M12852, M12859, M12861, M12862, M12869, M13111, M13112, M13119, M13151, M13152, M13159, M13161, M13162, M13169, M13811, M13812, M13819, M13851, M13852, M13859, M13861, M13862, M13869, M14611, M14612, M14619, M14651, M14652, M14659, M14661, M14662, M14669, M1468, M14811, M14812, M14819, M14851, M14852, M14859, M14861, M14862, M14869, M1488, M160, M1610, M1611, M1612, M162, M1630, M1631, M1632, M164, M1650, M1651, M1652, M166, M167, M169, M170, M1710, M1711, M1712, M172, M1730, M1731, M1732, M174, M175, M179, M19011, M19012, M19019, M19111, M19112, M19119, M19211, M19212, M19219, M21051, M21052, M21059, M21061, M21062, M21069, M21151, M21152, M21159, M21161, M21162, M21169, M21211, M21212, M21219, M21251, M21252, M21259, M21261, M21262, M21269, M2200, M2201, M2202, M2210, M2211, M2212, M222X1, M222X2, M222X9, M223X1, M223X2, M223X9, M2240, M2241, M2242, M228X1, M228X2, M228X9, M2290, M2291, M2292, M23001, M23002, M23003, M23004, M23005, M23006, M23007, M23009, M23011, M23012, M23019, M23021, M23022, M23029, M23031, M23032, M23039, M23041, M23042, M23049, M23051, M23052, M23059, M23061, M23062, M23069, M23200, M23201, M23202, M23203, M23204, M23205, M23206, M23207, M23209, M23211, M23212, M23219, M23221, M23222, M23229, M23231, M23232, M23239, M23241, M23242, M23249, M23251, M23252, M23259, M23261, M23262, M23269, M23300, M23301, M23302, M23303, M23304, M23305, M23306, M23307, M23309, M23311, M23312, M23319, M23321, M23322, M23329, M23331, M23332, M23339, M23341, M23342, M23349, M23351, M23352, M23359, M23361, M23362, M23369, M2340, M2341, M2342, M2350, M2351, M2352, M23601, M23602, M23609, M23611, M23612, M23619, M23621, M23622, M23629, M23631, M23632, M23639, M23641, M23642, M23649, M23671, M23672, M23679, M238X1, M238X2, M238X9, M2390, M2391, M2392, M24011, M24012, M24019, M24051, M24052, M24059, M24111, M24112, M24119, M24151, M24152, M24159, M24211, M24212, M24219, M24251, M24252, M24259, M2428, M24311, M24312, M24319, M24351, M24352, M24359, M24361, M24362, M24369, M24411, M24412, M24419, M24451, M24452, M24459, M24461, M24462, M24469, M24511, M24512, M24519, M24551, M24552, M24559, M24561, M24562, M24569, M24611, M24612, M24619, M24651, M24652, M24659, M24661, M24662, M24669, M247, M24811, M24812, M24819, M24851, M24852, M24859, M25011, M25012, M25019, M25051, M25052, M25059, M25061, M25062, M25069, M25111, M25112, M25119, M25151, M25152, M25159, M25161, M25162, M25169, M25211, M25212, M25219, M25251, M25252, M25259, M25261, M25262, M25269, M25311, M25312, M25319, M25351, M25352, M25359, M25361, M25362, M25369, M25411, M25412, M25419, M25451, M25452, M25459, M25461, M25462, M25469, M25511, M25512, M25519, M25551, M25552, M25559, M25561, M25562, M25569, M25611, M25612, M25619, M25651, M25652, M25659, M25661, M25662, M25669, M25711, M25712, M25719, M25751, M25752, M25759, M25761, M25762, M25769, M2578, M25811, M25812, M25819, M25851, M25852, M25859, M25861, M25862, M25869, M4000, M4003, M4004, M4005, M4010, M4012, M4013, M4014, M4015, M40202, M40203, M40204, M40205, M40209, M40292, M40293, M40294, M40295, M40299, M4030, M4035, M4036, M4037, M4040, M4045, M4046, M4047, M4050, M4055, M4056, M4057, M4100, M4102, M4103, M4104, M4105, M4106, M4107, M4108, M41112, M41113, M41114, M41115, M41116, M41117, M41119, M41122, M41123, M41124, M41125, M41126, M41127, M41129, M4120, M4122, M4123, M4124, M4125, M4126, M4127, M4130, M4134, M4135, M4140, M4141, M4142, M4143, M4144, M4145, M4146, M4147, M4150, M4152, M4153, M4154, M4155, M4156, M4157, M4180, M4182, M4183, M4184, M4185, M4186, M4187, M4200, M4201, M4202, M4203, M4204, M4205, M4206, M4207, M4208, M4209, M4210, M4211, M4212, M4213, M4214, M4215, M4216, M4217, M4218, M4219, M429, M4300, M4301, M4302, M4303, M4304, M4305, M4306, M4307, M4308, M4309, M4310, M4311, M4312, M4313, M4314, M4315, M4316, M4317, M4318, M4319, M433, M434, M435X2, M435X3, M435X4, M435X5, M435X6, M435X7, M435X8, M435X9, M438X1, M438X2, M438X3, M438X4, M438X5, M438X6, M438X7, M438X8, M439, M451, M451, M452, M452, M453, M453, M454, M454, M455, M455, M456, M456, M457, M457, M458, M458, M459, M459, M4600, M4601, M4602, M4603, M4604, M4605, M4606, M4607, M4608, M4609, M461, M4640, M4641, M4642, M4643, M4644, M4645, M4646, M4647, M4648, M4649, M4680, M4681, M4682, M4683, M4684, M4685, M4686, M4687, M4688, M4689, M4690, M4691, M4692, M4693, M4694, M4695, M4696, M4697, M4698, M4699, M47011, M47012, M47013, M47014, M47015, M47016, M47019, M4710, M4711, M4712, M4713, M4714, M4715, M4716, M4720, M4721, M4722, M4723, M4724, M4725, M4726, M4727, M4728, M47811, M47812, M47813, M47814, M47815, M47816, M47817, M47818, M47819, M47891, M47892, M47893, M47894, M47895, M47896, M47897, M47898, M47899, M479, M4800, M4801, M4802, M4803, M4804, M4805, M4806, M4807, M4808, M4810, M4811, M4812, M4813, M4814, M4815, M4816, M4817, M4818, M4819, M4820, M4821, M4822, M4823, M4824, M4825, M4826, M4827, M4840XA, M4840XD, M4840XG, M4840XS, M4841XA, M4841XD, M4841XG, M4841XS, M4842XA, M4842XD, M4842XG, M4842XS, M4843XA, M4843XD, M4843XG, M4843XS, M4844XA, M4844XD, M4844XG, M4844XS, M4845XA, M4845XD, M4845XG, M4845XS, M4846XA, M4846XD, M4846XG, M4846XS, M4847XA, M4847XD, M4847XG, M4847XS, M4848XA, M4848XD, M4848XG, M4848XS, M4850XA, M4850XD, M4850XG, M4850XS, M4851XA, M4851XD, M4851XG, M4851XS, M4852XA, M4852XD, M4852XG, M4852XS, M4853XA, M4853XD, M4853XG, M4853XS, M4854XA, M4854XD, M4854XG, M4854XS, M4855XA, M4855XD, M4855XG, M4855XS, M4856XA, M4856XD, M4856XG, M4856XS, M4857XA, M4857XD, M4857XG, M4857XS, M4858XA, M4858XD, M4858XG, M4858XS, M4980, M4981, M4982, M4983, M4984, M4985, M4986, M4987, M4988, M4989, M5000, M5001, M5002, M5003, M5010, M5011, M5012, M5013, M5020, M5021, M5022, M5023, M5030, M5031, M5032, M5033, M5080, M5081, M5082, M5083, M5090, M5091, M5092, M5093, M5104, M5105, M5106, M5106, M5114, M5115, M5116, M5116, M5117, M5117, M5124, M5125, M5126, M5126, M5127, M5127, M5134, M5135, M5136, M5136, M5137, M5137, M5184, M5185, M5186, M5186, M5187, M5187, M519, M532X7, M532X7, M532X8, M532X8, M533, M533, M5380, M5381, M5382, M5383, M5384, M5385, M5386, M5386, M5387, M5387, M5388, M5388, M539, M5410, M5411, M5412, M5413, M5414, M5415, M5416, M5416, M5417, M5417, M5418, M5418, M542, M5430, M5430, M5431, M5431, M5432, M5432, M5440, M5440, M5441, M5441, M5442, M5442, M545, M546, M5489, M549, M61011, M61012, M61019, M61111, M61112, M61119, M61211, M61212, M61219, M61311, M61312, M61319, M61411, M61412, M61419, M61511, M61512, M61519, M62011, M62012, M62019, M62111, M62112, M62119, M62211, M62212, M62219, M62411, M62412, M62419, M62511, M62512, M62519, M65011, M65011, M65012, M65012, M65019, M65019, M65111, M65112, M65119, M65151, M65152, M65159, M65161, M65162, M65169, M65811, M65812, M65819, M66111, M66112, M66119, M66151, M66152, M66159, M66211, M66212, M66219, M66811, M66812, M66819, M67211, M67212, M67219, M67311, M67312, M67319, M67351, M67352, M67359, M67361, M67362, M67369, M67411, M67412, M67419, M67451, M67452, M67459, M67461, M67462, M67469, M6750, M6751, M6752, M67811, M67812, M67813, M67814, M67819, M67851, M67852, M67853, M67854, M67859, M67861, M67862, M67863, M67864, M67869, M67911, M67912, M67919, M7040, M7041, M7042, M7050, M7051, M7052, M7060, M7061, M7062, M7070, M7071, M7072, M70811, M70812, M70819, M70911, M70912, M70919, M71011, M71011, M71012, M71012, M71019, M71019, M71051, M71051, M71052, M71052, M71059, M71059, M71061, M71061, M71062, M71062, M71069, M71069, M71111, M71112, M71119, M71151, M71152, M71159, M71161, M71162, M71169, M7120, M7121, M7122, M71311, M71312, M71319, M71351, M71352, M71359, M71451, M71452, M71459, M71461, M71462, M71469, M71551, M71552, M71559, M71561, M71562, M71569, M71811, M71812, M71819, M71851, M71852, M71859, M71861, M71862, M71869, M7500, M7501, M7502, M75101, M75102, M75111, M75112, M75121, M75122, M7520, M7521, M7522, M7530, M7531, M7532, M7540, M7541, M7542, M7550, M7551, M7552, M7580, M7581, M7582, M7590, M7591, M7592, M7600, M7601, M7602, M7610, M7611, M7612, M7620, M7621, M7622, M7650, M7651, M7652, M7912, M794, M953, M955, M9901, M9902, M9903, M9904, M9905, M9911, M9912, M9913, M9914, M9915, M9921, M9922, M9923, M9924, M9925, M9931, M9932, M9933, M9934, M9935, M9941, M9942, M9943, M9944, M9945, M9951, M9952, M9953, M9954, M9955, M9961, M9962, M9963, M9964, M9965, M9971, M9972, M9973, M9974, M9975, M9981, M9982, M9983, M9984, M9985, G5410, G5420, G5430, G5440, M2300, M4020

### Outcome variable

Opioid prescriptions were identified in pharmacy claims using national drug codes (NDC) listed in the 2020 CDC Opioid NDC and Oral MME Conversion File (1).

Confounding variables

### Comorbidities.

To identify comorbidities, we applied the Agency for Healthcare Research and Quality’s Clinical Classifications Software Refined taxonomy to primary ICD-10-CM codes in the claims data (2).

### MSK-related health care use during baseline.

We first identified services with MSK-related primary ICD-10-CM codes. Then, we categorized Current Procedural Terminology (CPT) and Healthcare Common Procedure Codes (HCPCS) into service categories using the Restructured Berenson-Eggers Type of Service Classification System (3).

### Standardized mean differences (SMD) tables

##### Table S1 Demographic characteristics

| **Member characteristics** | **Back** | **Knee** | **Shoulder** | **Hip** | **Neck** |
| --- | --- | --- | --- | --- | --- |
| Gender | -0.04 | -0.01 | -0.04 | 0.00 | -0.04 |
| Age group | 0.05 | 0.07 | 0.04 | 0.07 | 0.03 |
| Census Region | 0.09 | 0.11 | 0.09 | 0.07 | 0.08 |

##### Table S2 Comorbidities

| **Member characteristics** | **Back** | **Knee** | **Shoulder** | **Hip** | **Neck** |
| --- | --- | --- | --- | --- | --- |
| Comorbidity |  |  |  |  |  |
| Cardiometabolic-hypertension | 0.00 | -0.03 | 0.11 | 0.06 | 0.00 |
| Cardiometabolic-heart | 0.00 | 0.00 | 0.06 | -0.05 | 0.04 |
| Cardiometabolic-diabetes | 0.00 | -0.01 | -0.01 | -0.05 | -0.06 |
| Obesity | 0.00 | -0.04 | 0.00 | -0.06 | -0.03 |
| Mental health | 0.00 | -0.01 | -0.01 | -0.01 | -0.03 |
| Substance use | -0.01 | 0.03 | -0.03 | 0.03 | -0.04 |
| Autoimmune | -0.01 | 0.00 | 0.00 | -0.04 | -0.04 |
| Neuro | -0.02 | -0.03 | 0.02 | 0.02 | 0.01 |
| Respiratory | -0.01 | -0.02 | 0.00 | 0.00 | 0.03 |
| Concurrent MSK conditions (by region) |  |  |  |  |  |
| Back | . | -0.03 | -0.04 | -0.08 | 0.03 |
| Knee | 0.00 | . | 0.03 | 0.12 | 0.05 |
| Shoulder | 0.04 | 0.03 | . | -0.07 | 0.03 |
| Hip | -0.01 | 0.03 | 0.00 | . | -0.03 |
| Neck | -0.01 | 0.02 | -0.04 | -0.14 | . |

##### Table S3 MSK medical care use at baseline

| **Member characteristics** | **Back** | **Knee** | **Shoulder** | **Hip** | **Neck** |
| --- | --- | --- | --- | --- | --- |
| Number of injections | -0.03 | -0.04 | -0.05 | -0.09 | -0.01 |
| Number of ER visits | -0.03 | 0.01 | -0.05 | 0.00 | -0.03 |
| Number of orthopedic surgeon visits | -0.08 | -0.05 | -0.10 | 0.00 | 0.01 |
| Number of PT visits | -0.06 | 0.02 | -0.02 | 0.03 | -0.01 |
| Number of chiropractor visits | -0.05 | -0.05 | -0.05 | -0.06 | -0.03 |
| Any other MSK procedure (invasive) | -0.02 | -0.02 | -0.05 | -0.05 | -0.14 |
| Any chronic MSK evaluation and management services | -0.07 | -0.11 | -0.13 | -0.09 | -0.07 |
| Any imaging service | -0.06 | -0.09 | -0.11 | 0.01 | -0.03 |
| Any testing service | -0.05 | 0.06 | -0.05 | -0.09 | 0.01 |
| Any anesthesia service | -0.04 | 0.02 | -0.12 | 0.05 | 0.02 |
| Any DME | -0.02 | 0.04 | -0.08 | -0.05 | -0.05 |

### References

1. Centers for Disease Control and Prevention. Data Resources. Opioids. Published November 2, 2022. Accessed November 22, 2022. https://www.cdc.gov/opioids/data-resources/index.html
2. Agency for Healthcare Research and Quality. Clinical Classifications Software Refined (CCSR) [Internet]. Healthcare Cost and Utilization Project (HCUP). 2021 [cited 2022 Nov 29]. Available from: www.hcup-us.ahrq.gov/toolssoftware/ccsr/ccs_refined.jsp
3. Centers for Medicare & Medicaid Services. Restructured BETOS Classification System [Internet]. 2022 [cited 2022 Nov 29]. Available from: https://data.cms.gov/provider-summary-by-type-of-service/provider-service-classifications/restructured-betos-classification-system
